# Supplementary material for: High-resolution mapping of global winter-triticeae crops using a sample-free identification method
Source: Copernicus journal article supplement (doi:10.5194/essd-2023-432), 2023-12-05
Supplement: Supplementary file 1 [file essd-2023-432-supplement.pdf]

**Table S1:** The abbreviations of countries in the study area.

| <b>Number</b> | <b>Country</b>         | <b>Abbreviation</b> |
|---------------|------------------------|---------------------|
| 1             | Afghanistan            | AFG                 |
| 2             | Albania                | ALB                 |
| 3             | Algeria                | DZA                 |
| 4             | Argentina              | ARG                 |
| 5             | Australia              | AUS                 |
| 6             | Austria                | AUT                 |
| 7             | Azerbaijan             | AZE                 |
| 8             | Bangladesh             | BGD                 |
| 9             | Brazil                 | BRA                 |
| 10            | Belarus                | BLR                 |
| 11            | Belgium                | BEL                 |
| 12            | Bosnia and Herzegovina | BIH                 |
| 13            | Bulgaria               | BGR                 |
| 14            | China                  | CHN                 |
| 15            | Croatia                | HRV                 |
| 16            | Czechia                | CZE                 |
| 17            | Denmark                | DNK                 |
| 18            | Egypt                  | EGY                 |
| 19            | Estonia                | EST                 |
| 20            | Ethiopia               | ETH                 |
| 21            | Finland                | FIN                 |
| 22            | France                 | FRA                 |
| 23            | Germany                | DEU                 |
| 24            | Greece                 | GRC                 |
| 25            | Hungary                | HUN                 |
| 26            | India                  | IND                 |
| 27            | Iran                   | IRN                 |
| 28            | Iraq                   | IRQ                 |
| 29            | Ireland                | IRL                 |
| 30            | Italy                  | ITA                 |
| 31            | Kyrgyzstan             | KGZ                 |
| 32            | Latvia                 | LVA                 |
| 33            | Libya                  | LBY                 |
| 34            | Lithuania              | LTU                 |
| 35            | Mexico                 | MEX                 |
| 36            | Moldova                | MDA                 |
| 37            | Montenegro             | MNE                 |
| 38            | Morocco                | MAR                 |
| 39            | Nepal                  | NPL                 |
| 40            | Netherlands            | NLD                 |

|    |                      |     |
|----|----------------------|-----|
| 41 | North Macedonia      | MKD |
| 42 | Norway               | NOR |
| 43 | Pakistan             | PAK |
| 44 | Paraguay             | PRY |
| 45 | Poland               | POL |
| 46 | Portugal             | PRT |
| 47 | Romania              | ROU |
| 48 | Russia               | RUS |
| 49 | Serbia               | SRB |
| 50 | Slovakia             | SVK |
| 51 | Slovenia             | SVN |
| 52 | South Africa         | ZAF |
| 53 | Spain                | ESP |
| 54 | Sudan                | SDN |
| 55 | Sweden               | SWE |
| 56 | Switzerland          | CHE |
| 57 | Syrian Arab Republic | SYR |
| 58 | Tajikistan           | TJK |
| 59 | Tunisia              | TUN |
| 60 | Turkey               | TUR |
| 61 | Turkmenistan         | TKM |
| 62 | Ukraine              | UKR |
| 63 | United Kingdom       | UK  |
| 64 | Uruguay              | URY |
| 65 | Uzbekistan           | UZB |

**Table S2:** The abbreviations of states (provinces) in the study area.

| Country   | Number | State (Province)  | Abbreviation |
|-----------|--------|-------------------|--------------|
| Australia | 1      | New South Wales   | NSW          |
|           | 2      | Queensland        | QS           |
|           | 3      | South Australia   | SA           |
|           | 4      | Tasmania          | TS           |
|           | 5      | Victoria          | VT           |
|           | 6      | Western Australia | WA           |
| Brazil    | 7      | Minas Gerais      | MG           |
|           | 8      | Parana            | PR           |
|           | 9      | Rio Grande do Sul | RS           |
|           | 10     | Santa Catarina    | SC           |
|           | 11     | Sao Paulo         | SP           |
| China     | 12     | Anhui             | AH           |
|           | 13     | Gansu             | GS           |
|           | 14     | Hebei             | HB           |
|           | 15     | Henan             | HN           |

|       |    |                   |     |
|-------|----|-------------------|-----|
|       | 16 | Hubei             | HuB |
|       | 17 | Jiangsu           | JS  |
|       | 18 | Shandong          | SD  |
|       | 19 | Shanxi            | SAX |
|       | 20 | Shanxi            | SX  |
|       | 21 | Sichuan           | SC  |
|       | 22 | Xinjiang          | XJ  |
|       | 23 | Bihar             | BR  |
|       | 24 | Chhattisgarh      | CT  |
|       | 25 | Gujarat           | GJ  |
|       | 26 | Haryana           | HR  |
|       | 27 | Himachal Pradesh  | HP  |
|       | 28 | Jammu and Kashmir | JK  |
|       | 29 | Jharkhand         | JH  |
| India | 30 | Karnataka         | KA  |
|       | 31 | Madhya Pradesh    | MP  |
|       | 32 | Maharashtra       | MH  |
|       | 33 | Punjab            | PB  |
|       | 34 | Rajasthan         | RJ  |
|       | 35 | Uttar Pradesh     | UP  |
|       | 36 | Uttarakhand       | UT  |
|       | 37 | West Bengal       | WB  |
