# Supplementary material for: High-resolution mapping of global winter-triticeae crops using a sample-free identification method
Source: Copernicus journal article supplement (doi:10.5194/essd-2023-432), 2023-12-05
Supplement: Supplementary file [file essd-2023-432-AC1-supplement.zip]

**Table S1:** The sources of agricultural statistical data in all countries.

| Country         | Source                                                                                                                                                          |
|-----------------|-----------------------------------------------------------------------------------------------------------------------------------------------------------------|
| Afghanistan     | <a href="https://invest.gov.af/">https://invest.gov.af/</a>                                                                                                     |
| Albania         | <a href="http://www.instat.gov.al/">http://www.instat.gov.al/</a>                                                                                               |
| Argentina       | <a href="https://datosestimaciones.magyp.gob.ar/reportes.php?reporte=Estimaciones">https://datosestimaciones.magyp.gob.ar/reportes.php?reporte=Estimaciones</a> |
| Australia       | <a href="https://www.agriculture.gov.au/abares">https://www.agriculture.gov.au/abares</a>                                                                       |
| Austria         | <a href="https://www.statistik.at/">https://www.statistik.at/</a>                                                                                               |
| Azerbaijan      | <a href="https://www.stat.gov.az/source/agriculture/?lang=en">https://www.stat.gov.az/source/agriculture/?lang=en</a>                                           |
| Brazil          | <a href="https://www.ibge.gov.br/en/statistics/full-list-statistics.html">https://www.ibge.gov.br/en/statistics/full-list-statistics.html</a>                   |
| Belgium         | <a href="https://statbel.fgov.be/de">https://statbel.fgov.be/de</a>                                                                                             |
| Bulgaria        | <a href="https://www.agrostat.bg/ISASPublic/Crops">https://www.agrostat.bg/ISASPublic/Crops</a>                                                                 |
| China           | <a href="https://www.stats.gov.cn/sj/">https://www.stats.gov.cn/sj/</a>                                                                                         |
| Croatia         | <a href="https://dzs.gov.hr/">https://dzs.gov.hr/</a>                                                                                                           |
| Czechia         | <a href="https://www.czso.cz/csu/czso">https://www.czso.cz/csu/czso</a>                                                                                         |
| Denmark         | <a href="https://www.dst.dk/en/Statistik">https://www.dst.dk/en/Statistik</a>                                                                                   |
| Estonia         | <a href="https://www.stat.ee/">https://www.stat.ee/</a>                                                                                                         |
| Finland         | <a href="http://www.stat.fi/index_en.html">www.stat.fi/index_en.html</a>                                                                                        |
| France          | <a href="https://agreste.agriculture.gouv.fr/agreste-web/accueil/">https://agreste.agriculture.gouv.fr/agreste-web/accueil/</a>                                 |
| Germany         | <a href="https://www.statistik-nord.de/">https://www.statistik-nord.de/</a>                                                                                     |
| Greece          | <a href="https://www.statistics.gr/en/home/">https://www.statistics.gr/en/home/</a>                                                                             |
| Hungary         | <a href="https://www.ksh.hu/?lang=en">https://www.ksh.hu/?lang=en</a>                                                                                           |
| India           | <a href="https://aps.dac.gov.in/APY/Public_Report1.aspx">https://aps.dac.gov.in/APY/Public_Report1.aspx</a>                                                     |
| Iran            | <a href="https://irandataportal.syr.edu/socio-economic-data/statistical-yearbook">https://irandataportal.syr.edu/socio-economic-data/statistical-yearbook</a>   |
| Iraq            | <a href="https://cosit.gov.iq/ar/">https://cosit.gov.iq/ar/</a>                                                                                                 |
| Ireland         | <a href="https://data.cso.ie/">https://data.cso.ie/</a>                                                                                                         |
| Italy           | <a href="https://www.istat.it/en/">https://www.istat.it/en/</a>                                                                                                 |
| Kyrgyzstan      | <a href="http://stat.kg/en/">http://stat.kg/en/</a>                                                                                                             |
| Latvia          | <a href="https://stat.gov.lv/en">https://stat.gov.lv/en</a>                                                                                                     |
| Lithuania       | <a href="https://osp.stat.gov.lt/">https://osp.stat.gov.lt/</a>                                                                                                 |
| Montenegro      | <a href="http://www.monstat.org/eng/index.php">www.monstat.org/eng/index.php</a>                                                                                |
| Morocco         | <a href="https://www.hcp.ma/">https://www.hcp.ma/</a>                                                                                                           |
| Nepal           | <a href="https://moald.gov.np/">https://moald.gov.np/</a>                                                                                                       |
| Netherlands     | <a href="https://www.cbs.nl/en-gb">https://www.cbs.nl/en-gb</a>                                                                                                 |
| North Macedonia | <a href="https://www.stat.gov.mk/Default_en.aspx">https://www.stat.gov.mk/Default_en.aspx</a>                                                                   |
| Norway          | <a href="http://www.ssb.no/english/">www.ssb.no/english/</a>                                                                                                    |
| Pakistan        | <a href="https://www.pbs.gov.pk/">https://www.pbs.gov.pk/</a>                                                                                                   |
| Poland          | Statistical Office in Białystok / Publications                                                                                                                  |
| Portugal        | <a href="http://www.ine.pt/xportal/xmain?xpid=INE&amp;xpgid=ine_main">www.ine.pt/xportal/xmain?xpid=INE&amp;xpgid=ine_main</a>                                  |
| Romania         | <a href="http://statistici.insse.ro:8077/tempo-online">http://statistici.insse.ro:8077/tempo-online</a>                                                         |
| Russia          | <a href="https://rosstat.gov.ru/">https://rosstat.gov.ru/</a>                                                                                                   |
| Serbia          | <a href="https://www.stat.gov.rs">https://www.stat.gov.rs</a>                                                                                                   |
| Slovakia        | <a href="https://slovak.statistics.sk/wps/portal/ext/home">https://slovak.statistics.sk/wps/portal/ext/home</a>                                                 |

|                |                                                                                                   |
|----------------|---------------------------------------------------------------------------------------------------|
| Slovenia       | <a href="https://www.stat.si/statweb/en/home">https://www.stat.si/statweb/en/home</a>             |
| Spain          | <a href="https://www.ine.es/en/index.htm">https://www.ine.es/en/index.htm</a>                     |
| Sweden         | <a href="http://www.scb.se/en/">www.scb.se/en/</a>                                                |
| Switzerland    | <a href="https://www.bfs.admin.ch/bfs/de/home.html">https://www.bfs.admin.ch/bfs/de/home.html</a> |
| Turkey         | <a href="https://www.tuik.gov.tr/">https://www.tuik.gov.tr/</a>                                   |
| Ukraine        | <a href="https://statzvit.ukrstat.gov.ua/">https://statzvit.ukrstat.gov.ua/</a>                   |
| United Kingdom | <a href="https://www.gov.uk/">https://www.gov.uk/</a>                                             |
| United States  | <a href="https://www.nass.usda.gov/">https://www.nass.usda.gov/</a>                               |
| Other counties | <a href="https://www.fao.org/home/en/">https://www.fao.org/home/en/</a>                           |

**Table S2:** The abbreviations of countries in the study area.

| Number | Country                | Abbreviation |
|--------|------------------------|--------------|
| 1      | Afghanistan            | AFG          |
| 2      | Albania                | ALB          |
| 3      | Algeria                | DZA          |
| 4      | Argentina              | ARG          |
| 5      | Australia              | AUS          |
| 6      | Austria                | AUT          |
| 7      | Azerbaijan             | AZE          |
| 8      | Bangladesh             | BGD          |
| 9      | Brazil                 | BRA          |
| 10     | Belarus                | BLR          |
| 11     | Belgium                | BEL          |
| 12     | Bosnia and Herzegovina | BIH          |
| 13     | Bulgaria               | BGR          |
| 14     | China                  | CHN          |
| 15     | Croatia                | HRV          |
| 16     | Czechia                | CZE          |
| 17     | Denmark                | DNK          |
| 18     | Egypt                  | EGY          |
| 19     | Estonia                | EST          |
| 20     | Ethiopia               | ETH          |
| 21     | Finland                | FIN          |
| 22     | France                 | FRA          |
| 23     | Germany                | DEU          |
| 24     | Greece                 | GRC          |
| 25     | Hungary                | HUN          |
| 26     | India                  | IND          |
| 27     | Iran                   | IRN          |
| 28     | Iraq                   | IRQ          |
| 29     | Ireland                | IRL          |

---

|    |                      |     |
|----|----------------------|-----|
| 30 | Italy                | ITA |
| 31 | Kyrgyzstan           | KGZ |
| 32 | Latvia               | LVA |
| 33 | Libya                | LBY |
| 34 | Lithuania            | LTU |
| 35 | Mexico               | MEX |
| 36 | Moldova              | MDA |
| 37 | Montenegro           | MNE |
| 38 | Morocco              | MAR |
| 39 | Nepal                | NPL |
| 40 | Netherlands          | NLD |
| 41 | North Macedonia      | MKD |
| 42 | Norway               | NOR |
| 43 | Pakistan             | PAK |
| 44 | Paraguay             | PRY |
| 45 | Poland               | POL |
| 46 | Portugal             | PRT |
| 47 | Romania              | ROU |
| 48 | Russia               | RUS |
| 49 | Serbia               | SRB |
| 50 | Slovakia             | SVK |
| 51 | Slovenia             | SVN |
| 52 | South Africa         | ZAF |
| 53 | Spain                | ESP |
| 54 | Sudan                | SDN |
| 55 | Sweden               | SWE |
| 56 | Switzerland          | CHE |
| 57 | Syrian Arab Republic | SYR |
| 58 | Tajikistan           | TJK |
| 59 | Tunisia              | TUN |
| 60 | Turkey               | TUR |
| 61 | Turkmenistan         | TKM |
| 62 | Ukraine              | UKR |
| 63 | United Kingdom       | UK  |
| 64 | United States        | US  |
| 65 | Uruguay              | URY |
| 66 | Uzbekistan           | UZB |

---

**Table S3:** The abbreviations of states (provinces) in the study area.

| Country           | Number | State (Province)  | Abbreviation |
|-------------------|--------|-------------------|--------------|
| Australia         | 1      | New South Wales   | NSW          |
|                   | 2      | Queensland        | QS           |
|                   | 3      | South Australia   | SA           |
|                   | 4      | Tasmania          | TS           |
|                   | 5      | Victoria          | VT           |
|                   | 6      | Western Australia | WA           |
| Brazil            | 7      | Minas Gerais      | MG           |
|                   | 8      | Parana            | PR           |
|                   | 9      | Rio Grande do Sul | RS           |
|                   | 10     | Santa Catarina    | SC           |
|                   | 11     | Sao Paulo         | SP           |
| China             | 12     | Anhui             | AH           |
|                   | 13     | Gansu             | GS           |
|                   | 14     | Hebei             | HB           |
|                   | 15     | Henan             | HN           |
|                   | 16     | Hubei             | HuB          |
|                   | 17     | Jiangsu           | JS           |
|                   | 18     | Shandong          | SD           |
|                   | 19     | Shanxi            | SAX          |
|                   | 20     | Shanxi            | SX           |
|                   | 21     | Sichuan           | SC           |
|                   | 22     | Xinjiang          | XJ           |
| India             | 23     | Bihar             | BR           |
|                   | 24     | Chhattisgarh      | CT           |
|                   | 25     | Gujarat           | GJ           |
|                   | 26     | Haryana           | HR           |
|                   | 27     | Himachal Pradesh  | HP           |
|                   | 28     | Jammu and Kashmir | JK           |
|                   | 29     | Jharkhand         | JH           |
|                   | 30     | Karnataka         | KA           |
|                   | 31     | Madhya Pradesh    | MP           |
|                   | 32     | Maharashtra       | MH           |
|                   | 33     | Punjab            | PB           |
|                   | 34     | Rajasthan         | RJ           |
|                   | 35     | Uttar Pradesh     | UP           |
|                   | 36     | Uttarakhand       | UT           |
|                   | 37     | West Bengal       | WB           |
| The United States | 38     | Alabama           | AL           |
|                   | 39     | Arkansas          | AR           |
|                   | 40     | California        | CA           |
|                   | 41     | Colorado          | CO           |

---

|    |                |    |
|----|----------------|----|
| 42 | Delaware       | DE |
| 43 | Georgia        | GA |
| 44 | Idaho          | ID |
| 45 | Illinois       | IL |
| 46 | Indiana        | IN |
| 47 | Kansas         | KS |
| 48 | Kentucky       | KY |
| 49 | Maryland       | MD |
| 50 | Michigan       | MI |
| 51 | Mississippi    | MS |
| 52 | Missouri       | MO |
| 53 | Montana        | MT |
| 54 | Nebraska       | NE |
| 55 | New Jersey     | NJ |
| 56 | New Mexico     | NM |
| 57 | New York       | NY |
| 58 | North Carolina | NC |
| 59 | North Dakota   | ND |
| 60 | Ohio           | OH |
| 61 | Oklahoma       | OK |
| 62 | Oregon         | OR |
| 63 | Pennsylvania   | PA |
| 64 | South Carolina | SC |
| 65 | South Dakota   | SD |
| 66 | Tennessee      | TN |
| 67 | Texas          | TX |
| 68 | Utah           | UT |
| 69 | Virginia       | VA |
| 70 | Washington     | WA |
| 71 | Wisconsin      | WI |
| 72 | Wyoming        | WY |

---
